# Supplementary material for: A microporous metal–organic framework with Lewis basic pyridyl sites for selective gas separation of C2H2/CH4 and CO2/CH4 at room temperature
Source: Royal Society of Chemistry journal article supplement (doi:10.1039/c3ce40452h), 2013-01-01
Supplement: c3ce40452h.pdf [file c3ce40452h.pdf]

Supporting Information for the manuscript

## A Microporous Metal-Organic Framework with Lewis Basic Pyridyl Sites for Selective Gas Separation of C<sub>2</sub>H<sub>2</sub>/CH<sub>4</sub> and CO<sub>2</sub>/CH<sub>4</sub> at Room Temperature

Guohui Chen,<sup>a,b</sup> Zhangjing Zhang<sup>c</sup>, Shengchang Xiang<sup>c</sup> and Banglin Chen<sup>\*b</sup>

<sup>a</sup> College of Chemistry and Chemical Engineering, Central South University, Changsha, China 410083

<sup>b</sup> Department of Chemistry, University of Texas at San Antonio, One UTSA Circle, San Antonio, Texas 78249-0698, USA.

E-mail: banglin.chen@utsa.edu; Fax: (+1) 210-458-7428

<sup>c</sup> College of Chemistry and Materials, Fujian Normal University, 3 Shangsang Road, Cangshang Region, Fuzhou, China 350007

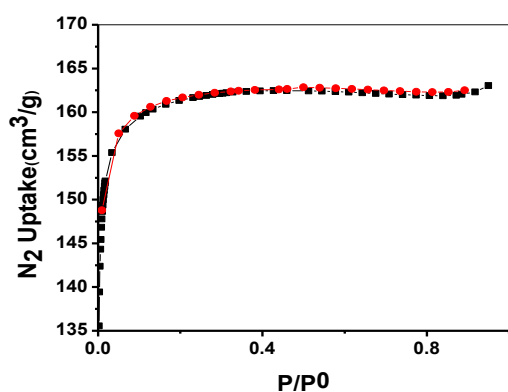

Figure S1 N<sub>2</sub> sorption isotherm of UTSA-5a at 77K
